1 ***In Vivo* Brain Glutathione is Higher in Older Age and Correlates with**  
2 **Mobility**

3  
4 K. E. Hupfeld<sup>1</sup>, H. W. Hyatt<sup>1</sup>, P. Alvarez Jerez<sup>1</sup>, M. Mikkelsen<sup>2,3</sup>, C. J. Hass<sup>1</sup>, R. A. E. Edden<sup>2,3</sup>,  
5 R. D. Seidler<sup>1,4</sup>, & E. C. Porges<sup>5\*</sup>

6  
7 <sup>1</sup>Department of Applied Physiology and Kinesiology, University of Florida, Gainesville, FL

8 <sup>2</sup>Russell H. Morgan Department of Radiology and Radiological Science, The Johns Hopkins  
9 University School of Medicine, Baltimore, MD

10 <sup>3</sup>F. M. Kirby Research Center for Functional Brain Imaging, Kennedy Krieger Institute,  
11 Baltimore, MD

12 <sup>4</sup>Department of Neurology, University of Florida, Gainesville, FL

13 <sup>5</sup>Department of Clinical and Health Psychology, University of Florida, Gainesville, FL

14  
15 \*Correspondence to:

16 Eric C. Porges, PhD

17 [eporges@phhp.ufl.edu](mailto:eporges@phhp.ufl.edu)

18 (352) 294-5838

19

20 **Submission Type:** Research Article

21 **Subject Area:** Neuroscience

22

23 **Keywords:** glutathione (GSH), magnetic resonance spectroscopy (MRS), Hadamard Encoding  
24 and Reconstruction of MEGA-Edited Spectroscopy (HERMES), aging, balance, gait, manual  
25 dexterity

26

27 **Running Title:** BRAIN GLUTATHIONE AND AGING

28 **Abstract**

29           Brain markers of oxidative damage increase with advancing age. In response, brain  
30 antioxidant levels may also increase with age, although this has not been well investigated.  
31 Here we used edited magnetic resonance spectroscopy to quantify endogenous levels of  
32 glutathione (GSH, one of the most abundant brain antioxidants) in 37 young (mean: 21.8 (2.5)  
33 years; 19 F) and 23 older adults (mean: 72.8 (8.9) years; 19 F). Accounting for age-related  
34 atrophy, we identified higher frontal and sensorimotor GSH levels for the older compared to the  
35 younger adults. For the older adults only, higher sensorimotor (but not frontal) GSH was  
36 correlated with poorer balance, gait, and manual dexterity. This suggests a regionally-specific  
37 relationship between higher brain oxidative stress levels and motor performance declines with  
38 age. We suggest these findings reflect a compensatory upregulation of GSH in response to  
39 increasing brain oxidative stress with normal aging. Together, these results provide insight into  
40 age differences in brain antioxidant levels and implications for motor function.

## 41 **Introduction**

42           The role of oxidative stress in brain aging has been studied since the emergence of the  
43 free radical theory of aging. This theory posits that the cumulative result of a lifetime of oxidative  
44 insult is diminished tissue functioning and the aging phenotype (Harman, 1955). While evidence  
45 exists both for and against the free radical theory of aging, the literature largely agrees that  
46 markers of brain oxidative damage increase with advancing age (Chakrabarti et al., 2011). The  
47 brain is a highly oxidative organ that consumes 20% of the body's total oxygen uptake despite  
48 accounting for only 2% of the body's total weight (Hyder et al., 2013; Quastel & Wheatley,  
49 1932). This high rate of oxygen consumption, along with high levels of oxidizable iron molecules  
50 and polyunsaturated fats, increases the propensity of the brain to form reactive oxygen species  
51 (ROS). ROS production is a natural phenomenon that contributes to cell signaling. Excessive  
52 ROS production can lead to oxidative damage and requires detoxification of ROS molecules by  
53 antioxidant sources to prevent oxidative stress. Therefore, it is important to understand if  
54 antioxidant levels change in the brain with aging and if these changes relate to functional  
55 impairments, such as declines in cognition and motor control.

56           Glutathione (GSH) is one of the most abundant antioxidant sources in the central  
57 nervous system and plays a key role in the maintenance of redox homeostasis (Rice et al.,  
58 2002). Within the brain, GSH abundance appears to vary by cell type (Huang & Philbert, 1995;  
59 Langeveld et al., 1996; Raps et al., 1989; Rice & Russo-Menna, 1997) and brain region  
60 (Calabrese et al., 2002; Nezhad et al., 2017; Perry et al., 1971; Srinivasan et al., 2010). For  
61 detailed reviews of GSH biochemical characteristics, functions, and locations, see (Dringen,  
62 2000; Dwivedi et al., 2020; Rae & Williams, 2017). While several studies have measured age  
63 differences in cortical GSH, current understanding of such changes remains equivocal. Rodent  
64 model studies have suggested that GSH decreases with age (e.g., (Chen et al., 1989; Liu, 2002;  
65 Sasaki et al., 2001)), but others have found no changes (e.g., (Asuncion et al., 1996; Hussain et  
66 al., 1995)). Post-mortem human work has reported no age-related differences in brain GSH

67 levels (Tong et al., 2016; Venkateshappa et al., 2012), lower GSH levels among older adults  
68 (Venkateshappa et al., 2012), and similar or higher GSH levels in older age (Tong et al., 2016).  
69 Of note, these previous attempts to measure GSH levels with aging have been hampered by a  
70 lack of non-invasive procedures; furthermore, measurements in post-mortem conditions are  
71 subject to GSH breakdown (Perry et al., 1981), complicating interpretations and comparison to  
72 *in vivo* GSH levels.

73         Recent advances in spectral editing now make it possible to resolve GSH with magnetic  
74 resonance spectroscopy (MRS) (Saleh et al., 2016). Previously, without the use of spectral  
75 editing, GSH could not be quantified at 3 Tesla (Nezhad et al., 2017). Only one study to date  
76 has used edited MRS to compare GSH levels between normal young and older adults (Emir et  
77 al., 2011). This study scanned the occipital cortex and reported that GSH levels were 30% lower  
78 for older compared to younger adults (Emir et al., 2011). In the present study, we used  
79 Hadamard Encoding and Reconstruction of MEGA-Edited Spectroscopy (HERMES) (Saleh et  
80 al., 2016; Saleh et al., 2019) to examine age differences in GSH levels in the frontal and  
81 sensorimotor cortices, brain regions involved in cognitive function and mobility, respectively. Of  
82 note, as a recent review (Cleeland et al., 2019) discusses, few studies have explored age-  
83 related changes in neurometabolite levels in the sensorimotor cortex, and no previous studies  
84 have characterized age differences in GSH levels within the sensorimotor cortex.

85         While our current understanding of how aging affects brain GSH levels is limited, some  
86 evidence suggests that cortical GSH may be associated with cognitive and sensorimotor  
87 function. Normal aging results in cognitive decrement (Anstey & Low, 2004), as well as  
88 widespread motor decline, including difficulties with fine motor control (Seidler & Stelmach,  
89 1995), balance (Downs et al., 2014), and walking (Rantakokko et al., 2013). Past work has  
90 found lower brain GSH levels in patients with mild cognitive impairment (MCI) and Alzheimer's  
91 disease (AD) compared to normal aging (Mandal et al., 2015; Mandal et al., 2012). Lower levels  
92 of brain GSH in the frontal cortex (Mandal et al., 2015; Mandal et al., 2012), parietal cortex

93 (Oeltzschner et al., 2019), and hippocampus (Mandal et al., 2015) have been associated with a  
94 larger degree of cognitive impairment in MCI and AD. Despite this, the limited work in normal  
95 aging has not found relationships between MRS-measured brain GSH levels and cognitive  
96 status (Chiang et al., 2017; Emir et al., 2011). Moreover, relationships between motor function  
97 and brain GSH levels have not yet been tested for normal older adults, although there is some  
98 support for a relationship between GSH and motor function, given that GSH levels are altered in  
99 various movement disorders. For instance, MRS-measured GSH levels are decreased in  
100 multiple sclerosis (motor cortex (Srinivasan et al., 2010), frontal cortex (Choi et al., 2011)),  
101 amyotrophic lateral sclerosis (motor cortex (Weerasekera et al., 2019; Weiduschat et al., 2014)),  
102 and spinocerebellar ataxia (cerebellum (Doss et al., 2015)). Although these studies did not  
103 report relationships between brain GSH levels and motor performance or disease severity, past  
104 rodent work has found that transient basal ganglia GSH depletion results in pronounced  
105 sensorimotor impairments (Díaz-Hung et al., 2014). Taken together, it is plausible that  
106 alterations in regional brain GSH levels may affect cognitive and sensorimotor function,  
107 although it is unclear whether this relationship would be evident in normal aging, or only in  
108 pathological conditions. In the present work, we tested associations between brain GSH levels  
109 and performance. We predicted regionally-specific relationships in which frontal GSH levels  
110 would be associated with cognitive performance, and sensorimotor GSH levels would be  
111 associated with motor performance.

112 Overall, it remains unclear how human brain GSH levels alter with aging and whether  
113 brain GSH is associated with cognitive or motor function. Based on the limited *in vivo* human  
114 work (Emir et al., 2011) and the larger body of animal and post-mortem human studies, it is  
115 plausible that brain GSH levels would be lower in older adults. If GSH levels are lower in older  
116 age, this may indicate greater oxidative stress burden, thereby exhausting brain antioxidant  
117 capacity. However, if GSH levels are higher for older adults, this could suggest a compensatory  
118 upregulation response to increased oxidative stress. For instance, there is evidence that mild

119 stress increases brain GSH levels; this upregulation of GSH is thought to provide protection  
120 against more severe oxidative stress (for review, see (Maher, 2005)). Thus, it is possible that  
121 normal aging could be associated with higher brain GSH levels as a compensatory response to  
122 generalized aging processes.

123 The aims of the present study included: 1) to determine whether there are age  
124 differences in *in vivo* MRS-measured brain GSH levels in the frontal and sensorimotor cortices;  
125 2) to characterize regional differences in brain GSH levels; and 3) to characterize the  
126 relationships between brain GSH levels and cognitive and motor function.

## 127 **Results**

128 37 young and 23 older adults completed cognitive and motor testing, as well as  
129 collection of MRS data from voxels placed in the frontal and sensorimotor cortices. Of note, we  
130 applied the Benjamini-Hochberg false discovery rate (FDR) correction (Benjamini & Hochberg,  
131 1995) to all  $p$ -values reported below; aside from two cases where the corrected  $p$ -values were  $p$   
132  $< 0.10$ , all results remained significant ( $p < 0.05$ ) after applying this correction for multiple  
133 comparisons.

## 134 ***Demographics***

135 There were no significant age differences for most demographic variables, including sex,  
136 alcohol use, handedness, or footedness. Importantly, there were also no age differences in the  
137 number of days elapsed between the two testing sessions or in the difference in start time for  
138 the two sessions. See Table A1 for complete demographic information.

## 139 ***Higher GSH Levels in Older Age***

140 The older adult group exhibited cortical atrophy, with both voxels showing a lower gray  
141 matter fraction and higher cerebrospinal fluid (CSF) fraction compared to the younger adults  
142 (Table A2; Fig. 1). Older adults also had less white matter within the frontal voxel compared to  
143 younger adults. Older adults had significantly higher CSF-corrected GSH levels in both voxels  
144 (Fig. 2; although age differences in frontal GSH levels remained only at trend-level significance,

145  $p = 0.066$ , after FDR correction for multiple comparisons). This difference in CSF-corrected  
146 GSH levels implies that there is an age-related increase in cortical GSH concentration within the  
147 tissue that remains in the voxel after accounting for age-related atrophy. Importantly, there was  
148 no age difference in GSH fit error or water full width at half maximum (FWHM).

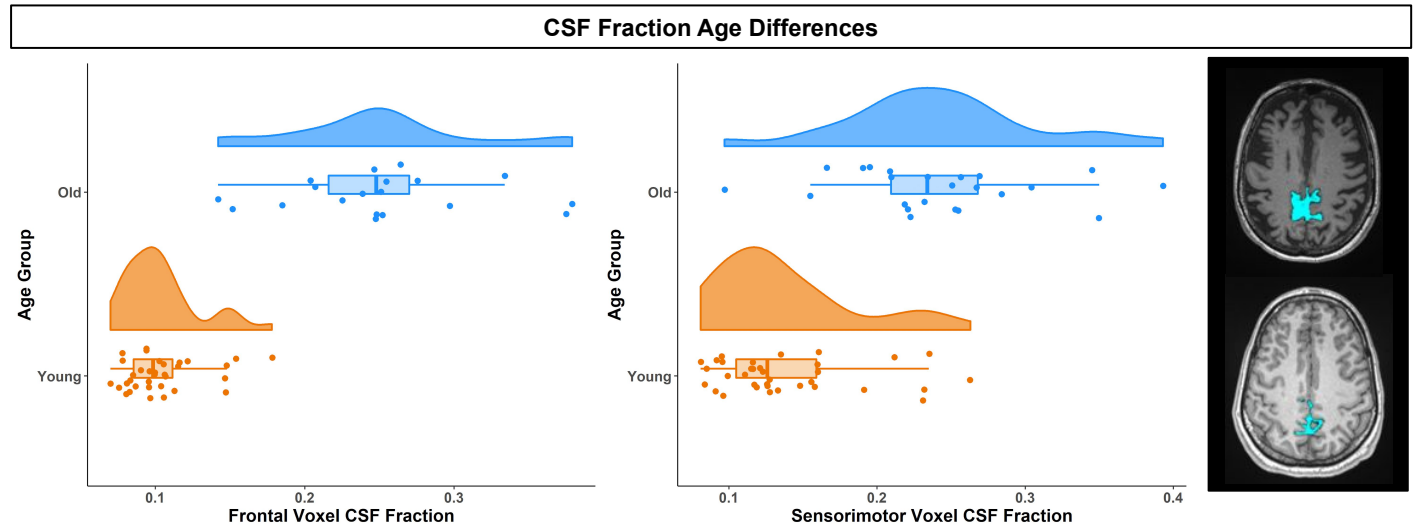

149 **Fig. 1. Higher CSF Fraction in Older Age.** *Left.* CSF fraction within the frontal (left) and sensorimotor  
150 (right) voxels for older (blue) and young (orange) adults. In both voxels, older adults had higher CSF  
151 concentrations compared to young adults. *Right.* CSF fraction (blue) within the sensorimotor voxel, shown  
152 for a single older (top) and a single younger (bottom) participant. The CSF fraction is overlaid onto each  
153 subject's native space  $T_1$ -weighted anatomical image.

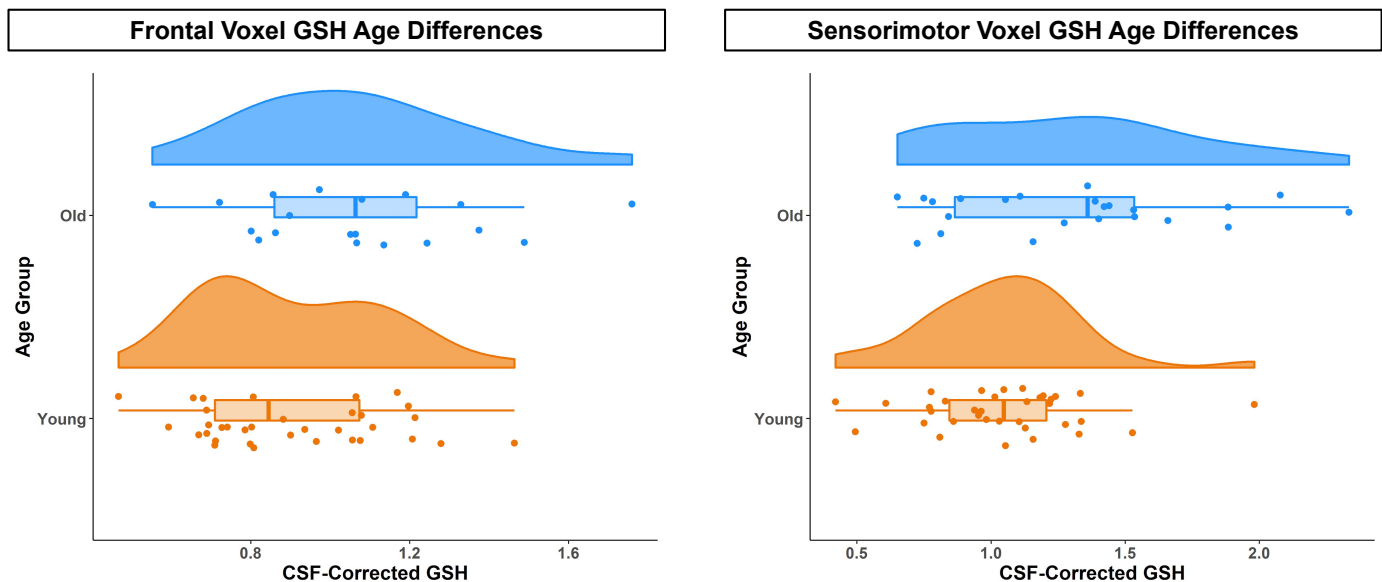

154 **Fig. 2. Higher GSH Levels in Older Age.** CSF-corrected GSH levels for older (blue) and young (orange)  
155 adults in the frontal (left) and sensorimotor (right) voxels. Across both voxels, older adults had higher  
156 CSF-corrected GSH levels.

157 **Higher GSH Levels in Sensorimotor versus Frontal Cortex**

158 Frontal GSH levels positively correlated with sensorimotor GSH levels for both the young  
159 and older adults (Table A3; Fig. 3). This relationship was in the same direction for both groups,  
160 and the correlation strength did not significantly differ by age. Within subjects, both groups also  
161 had higher GSH levels in the sensorimotor voxel compared to the frontal voxel. The magnitude  
162 of this regional effect did not differ between the age groups. For young adults, the gray matter  
163 and CSF fraction was higher and the white matter fraction was lower in the sensorimotor  
164 compared to the frontal voxel. However, for older adults, there were no significant differences in  
165 tissue composition between the two voxels.

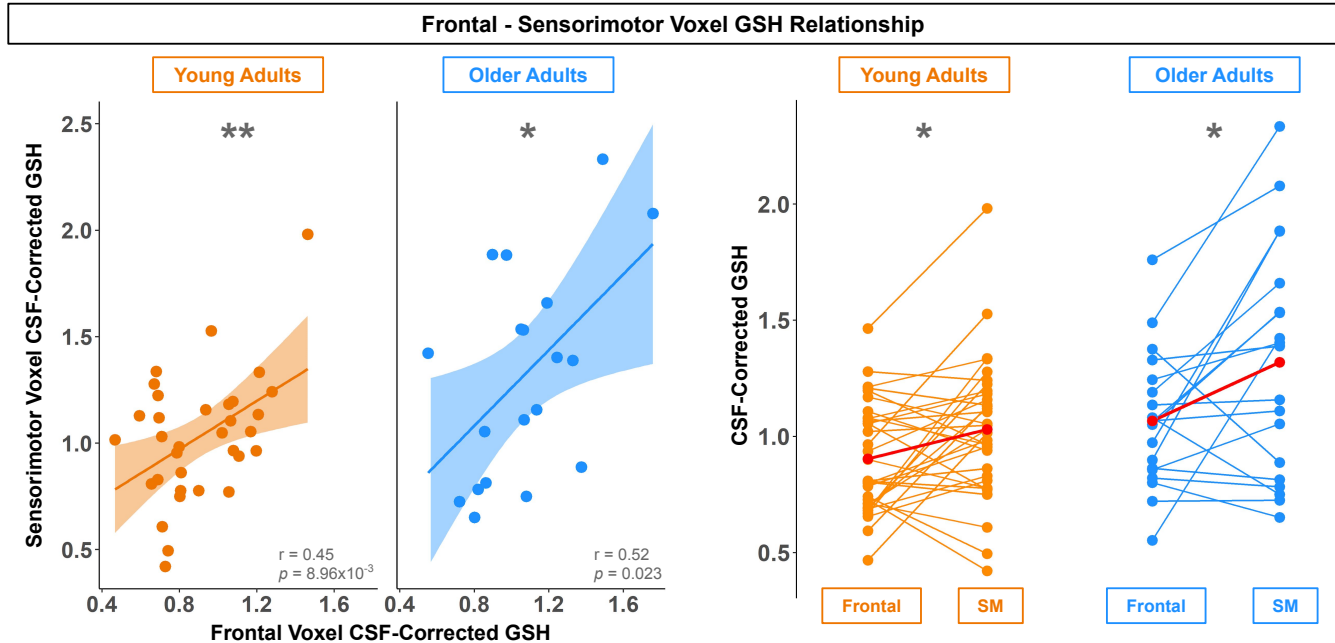

166 **Fig. 3. Higher GSH Levels in Sensorimotor versus Frontal Cortex.** \* $p < 0.05$ ; \*\* $p < 0.01$ . *Left.*  
167 Correlation of CSF-corrected GSH levels for the frontal and sensorimotor voxels for young (orange, left)  
168 and older (blue, right) adults. For both age groups, higher frontal GSH levels associated with higher  
169 sensorimotor GSH levels. *Right.* Frontal and SM (sensorimotor) voxel CSF-corrected GSH levels within  
170 each young (orange, left) and older (blue, right) adult. Each line represents one subject. For both age  
171 groups, GSH levels (group medians shown in red) were higher in the sensorimotor compared to the  
172 frontal voxel.

173  
174 **GSH Relationships with Motor but Not Cognitive Performance for Older Adults Only**

175 We did not observe relationships between frontal voxel GSH and performance, or  
176 between GSH and MoCA scores (Tables A4-A5). However, higher GSH levels within the



177 sensorimotor, but not the frontal voxel, were associated with poorer performance on multiple  
178 motor measures for the older adults only.

179 Greater medial/lateral (M/L) sway speed and variability (i.e., greater postural instability)  
180 was correlated with higher GSH levels only for the older adults (Table A5; Fig. 4). The young  
181 adults had a weak but non-significant positive association between M/L sway speed and  
182 variability and GSH levels; there was a trend for an age difference in the partial correlation  
183 strength ( $p = 0.064$ ).

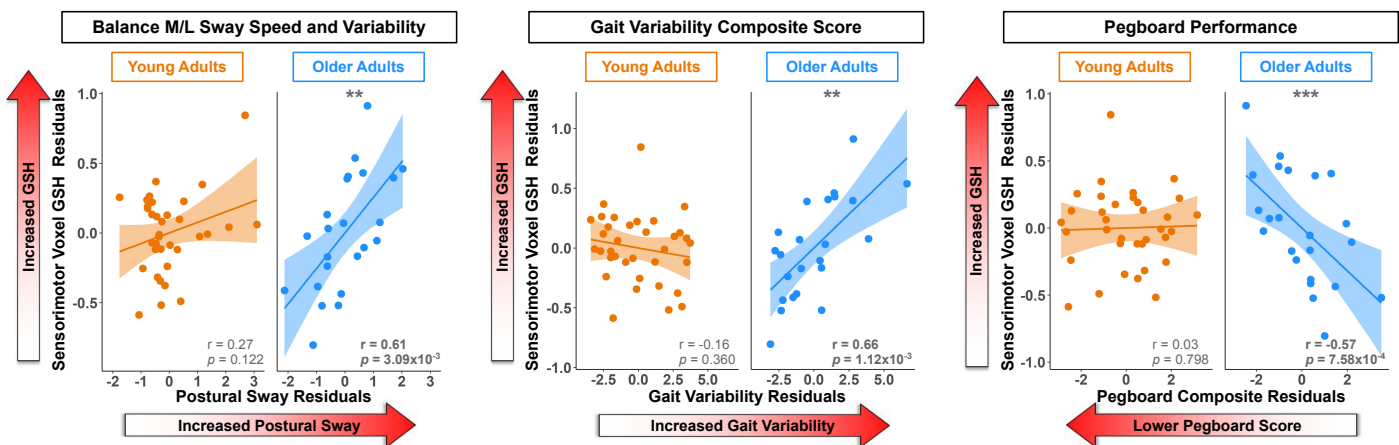

184 **Fig. 4. GSH Relationships with Motor but Not Cognitive Performance for Older Adults Only.**  $**p <$   
185  $0.01$ ;  $***p < 0.001$ . Partial correlations of CSF-corrected GSH levels with M/L postural sway, gait  
186 variability, and pegboard performance for young (orange) and older (blue) adults. Partial correlations are  
187 accounting for the effects of the covariates included in each model. In each of these cases, there was a  
188 significant relationship between higher sensorimotor GSH levels and poorer motor performance for the  
189 older but not the younger adults.

190  
191 Greater gait variability was correlated with higher sensorimotor GSH levels for the older  
192 adults only (Table A5; Fig. 4). No relationship emerged between gait variability and GSH levels  
193 for the young adults; the partial correlation strength was significantly different between young  
194 and older adults. As there is some evidence that walking speed contributes to gait variability  
195 (e.g., (Jordan et al., 2007)), we reran these models also including gait speed as a covariate; the  
196 relationship between sensorimotor GSH and gait variability for older adults remained significant  
197 ( $p = 0.004$ ).

198 Poorer pegboard composite scores were associated with higher GSH levels only for the  
199 older adults (Table A5; Fig. 4), and there was a significant age difference in the partial

200 correlation strength. Of note, although we measured sensorimotor GSH levels over the *lower*  
201 *limb* cortical representation, we still observed this GSH relationship with upper limb motor  
202 coordination. It was not the case that the pegboard composite score correlated with balance and  
203 gait ( $r = -0.04$  and  $-0.08$  for young adults;  $r = -0.23$  and  $-0.31$  for older adults;  $p > 0.05$  in all  
204 cases); thus pegboard scores specifically index manual function.

205 To further test the specificity of the identified relationships between GSH and motor  
206 function for older adults, and not global shifts in metabolite concentrations, we reran the  
207 significant models above including as predictors the two other neurometabolites edited by  
208 HERMES: the excitatory neurochemicals glutamate + glutamine (Glx) and the primary inhibitory  
209 neurotransmitter within the brain,  $\gamma$ -aminobutyric acid (GABA). All relationships between  
210 physical function and GSH remained when including Glx and GABA as additional predictors; for  
211 older adults, the relationships remained significant between sensorimotor GSH levels and M/L  
212 sway speed/variability ( $p = 0.007$ ), gait variability ( $p = 0.003$ ), and manual dexterity ( $p = 0.008$ ).  
213 There were no significant relationships between Glx or GABA levels and these motor metrics.

## 214 **Discussion**

215 We identified higher CSF-corrected frontal and sensorimotor GSH levels for older  
216 compared to younger adults when accounting for age-related cortical atrophy. For both age  
217 groups, we identified a positive correlation between frontal and sensorimotor GSH levels, as  
218 well as higher GSH levels for the sensorimotor compared to the frontal voxel. For the older  
219 adults only, we identified multiple relationships between higher sensorimotor GSH levels and  
220 poorer motor performance.

221 One potential explanation for higher brain GSH levels for older adults is that higher  
222 levels of GSH occur as a compensatory response in an attempt to mitigate age-related  
223 increases in oxidative stress and maintain regional redox homeostasis within the brain. That is,  
224 perhaps in normal aging, in some regions of the brain, GSH antioxidant levels increase in  
225 response to increasing oxidative stress that occurs during aging. Past *in vivo* human studies

226 have found higher MRS-measured GSH levels in MCI compared to age-matched controls (Duffy  
227 et al., 2014), but lower GSH levels in AD compared to controls (Mandal et al., 2015). Given the  
228 association between cognitive impairment and ROS production (Brawek et al., 2010), these  
229 findings could be interpreted as a ROS-induced compensatory upregulation of GSH in the early  
230 stages of cognitive decline. Similarly, past evidence suggests that MRS-measured GSH levels  
231 are higher in early schizophrenia (Wood et al., 2009), but lower after full symptoms emerge  
232 (Matsuzawa et al., 2008). Higher MRS-measured GSH levels have also been reported in post-  
233 traumatic stress disorder (Michels et al., 2014) and early psychosis (Godlewska et al., 2014).  
234 Further, pharmacologically-induced GSH depletion in the brain has been shown to result in  
235 cognitive decline in rodents (González-Fraguela et al., 2018). Therefore, high GSH levels could  
236 be associated with high levels of underlying cellular stress (e.g., ROS emissions) until reaching  
237 a threshold that exceeds the hormetic response capabilities of the cell.

238         The precise mechanisms that dictate GSH regulation in the aging brain remain unknown.  
239 Nonetheless, in theory, an increase in GSH could reflect either upregulation of GSH production  
240 or downregulation of GSH catabolism. For instance, one study (Mythri et al., 2011) found  
241 significantly less  $\gamma$ -glutamyl transpeptidase ( $\gamma$ -GT) activity in the cortex and striatum of  
242 Parkinson's disease patients, suggesting that lower rates of GSH breakdown were contributing  
243 to the increased GSH seen in these tissue samples.

244         Increased oxidative stress with aging could also explain increases in GSH. Increases in  
245 cellular antioxidants in response to oxidative insults have been well documented. Multiple  
246 animal model and cell culture studies have shown a compensatory upregulation of GSH in  
247 response to oxidative stress (Ong et al., 2000), including exposure to toxins such as mercury  
248 (Hoffman et al., 2005), radiation (Di Toro et al., 2007), neonatal alcohol (Smith et al., 2005), and  
249 methamphetamine (Harold et al., 2000), as well as neurological diseases such as models of  
250 Parkinson's disease (Aluf et al., 2010; Rodríguez Navarro et al., 2007), Huntington's disease  
251 (Tkac et al., 2007), and AD (Tchantchou et al., 2005).

252 While aberrant ROS production can be detrimental to cellular health, ROS also serve as  
253 signaling molecules capable of regulating transcriptional events in the cell. The Keap1/Nrf2  
254 signaling pathway is a canonical oxidative stress sensor in the cell. Nrf2 is a key protein  
255 responsible for increasing antioxidant enzymes by regulating transcription of antioxidant-related  
256 genes (Itoh et al., 1999). The endogenous protein, Keap1, suppresses Nrf2 activity under basal  
257 conditions by facilitating its removal from the cell. However, oxidative modification of Keap1 by  
258 ROS removes its inhibitory effects on Nrf2 and allows for Nrf2-mediated transcription of  
259 antioxidant related genes (Sekhar et al., 2010). Importantly, Nrf2 regulates transcription of the  
260 rate-limiting enzyme responsible for synthesizing GSH,  $\gamma$ -glutamate-cysteine ligase (Yang et al.,  
261 2005). Therefore, increased ROS emissions with brain aging may result in increased GSH via  
262 the Keap1/Nrf2 signaling pathway. There is some literature support for this idea; for instance,  
263 exposure of astrocytes in cell culture to high levels of ROS induces transcription of genes  
264 responsible for synthesizing GSH (Gegg et al., 2003; Sagara et al., 1996).

265 It could also be that the observed GSH changes relate to changes in cell type  
266 abundance within the aging brain. As GSH is present in higher concentrations in glia compared  
267 to neurons (Rice & Russo-Menna, 1997), increasing GSH levels could be associated with the  
268 increased gliosis that occurs with brain aging (Tong et al., 2011). Stereological cell counting in  
269 post-mortem human brain suggests that the abundance of astrocytes, one of the predominant  
270 producers of brain GSH, remains constant throughout aging while the abundance of other cell  
271 types (e.g., oligodendrocytes) decreases (Pelvig et al., 2008). This may be particularly important  
272 given that astrocytes are also more capable of inducing the antioxidant defense response via  
273 Nrf2 signaling compared to other neuronal cell types (Baxter & Hardingham, 2016).

274 This finding of higher CSF-corrected GSH levels for older compared to younger adults is  
275 in line with the results of Tong and colleagues (Tong et al., 2016). This group identified GSH  
276 increases across the lifespan (i.e., 1 day to 99 years old) in post-mortem frontal cortex.  
277 However, this finding is in contrast to the results of Emir and colleagues (2011) who reported

278 lower occipital cortex GSH levels for older compared to younger adults using edited MRS at 4T.  
279 There are several key differences between our work and this study. Emir and colleagues  
280 examined a different brain region, and their elderly sample ( $76.6 \pm 6.1$  years) was older than  
281 ours; these factors likely contributed to their differing results. More recent work by this group  
282 using non-edited MRS at 7T found no age differences in posterior cingulate or occipital cortex  
283 GSH levels (Marjańska et al., 2017); however, again, this study tested different brain regions  
284 and an older sample compared to our work. The lack of GSH age differences in posterior brain  
285 regions (but not frontal or sensorimotor cortex) could also be due in part to the well-established  
286 posterior to anterior shift of brain activity with aging (Davis et al., 2008; Jockwitz et al., 2019). It  
287 could be that reduced neural signaling within posterior brain areas leads to lower regional GSH  
288 levels; that is, compensatory upregulation of GSH has ceased in these posterior regions as the  
289 hormetic response capabilities of these cells have been exceeded.

290         Given the limited age range in the present study, it is unknown whether the apparent  
291 age-related increase in brain GSH presented here may abate in extreme conditions of oxidative  
292 stress, such as neurological disease or very old age, as the compensatory response is  
293 overwhelmed (e.g., as recycling or *de novo* synthesis mechanisms are compromised). Future  
294 longitudinal studies and enrollment of much older adults would clarify this.

295         Some work has reported regional differences in cortical GSH levels (Nezhad et al., 2017;  
296 Srinivasan et al., 2010; Tong et al., 2016). Here we found a positive correlation between frontal  
297 and sensorimotor CSF-corrected GSH levels for both young and older adults, as well as higher  
298 GSH levels in the sensorimotor compared to the frontal voxel for both age groups. However, we  
299 identified tissue composition differences between the two voxels for the younger adults only.  
300 Young adults had higher gray matter and CSF and lower white matter fractions in the  
301 sensorimotor compared to the frontal voxel. For older adults, there were no tissue composition  
302 differences between voxels. These young adult findings fit with one past study reporting higher  
303 GSH concentrations in voxels with more gray matter than white matter (Srinivasan et al., 2010).

304 However, another study (Nezhad et al., 2017) reported conflicting findings of higher GSH  
305 concentrations in the cortical region with less gray matter (i.e., anterior cingulate versus occipital  
306 cortex). Thus, as we did not find voxel composition differences for the older adults, but we did  
307 find higher sensorimotor versus frontal GSH levels, we suspect that (as discussed by Rae and  
308 Williams (2017)), GSH levels likely vary across brain region, but in a more complex manner than  
309 that which reflects only gray and white matter differences. This notion is further supported by  
310 recent work suggesting that human primary motor and somatosensory cortices show  
311 proportionally steeper trajectories of volume, myelin, and iron declines with advancing age  
312 compared to other brain regions (Taubert et al., 2020). It could be that the sensorimotor cortex  
313 structure and neurochemical composition is affected more or earlier by oxidative stress  
314 compared to other brain regions.

315       There were no associations between GSH levels and cognitive performance (i.e., MoCA  
316 scores). Our past work (Porges, Woods, Edden, et al., 2017) suggests that MoCA scores are  
317 sensitive enough to identify associations between MRS-measured neurometabolites and  
318 cognitive status. In contrast to our previous work ( $n = 93$  older adults; mean age =  $73.2 \pm 9.9$ ),  
319 here we included fewer participants, although our older adult ages were similar. Additionally,  
320 participants in the present sample had higher MoCA scores compared to our previous work  
321 (mean =  $25.5 \pm 2.5$ ). It could be that, among this higher-functioning older adult cohort, we did  
322 not have enough variation in MoCA scores to identify a significant association. Furthermore, the  
323 limited past work in normal aging has failed to find any relationships between GSH levels and  
324 cognitive status (Chiang et al., 2017; Emir et al., 2011); such a relationship has previously been  
325 identified only in pathological conditions such as MCI and AD (Mandal et al., 2015; Mandal et  
326 al., 2012; Oeltzschner et al., 2019). Thus, it could be that GSH-cognition relationships only  
327 emerge in cases of more severe cognitive decline, when brain resources (such as antioxidant  
328 availability) have substantially declined.

329           We found several associations between higher GSH levels and poorer motor  
330 performance (i.e., greater M/L postural sway, greater gait variability, and poorer manual  
331 dexterity). These motor performance variables have functional significance. Greater M/L  
332 postural sway (Maki et al., 1994; Stel et al., 2003) and greater gait variability (e.g., (Hausdorff et  
333 al., 2001)) associate with a greater risk of falling for older adults. Declines in manual function  
334 are associated with decreased independence for older adults (Falconer et al., 1991; Williams et  
335 al., 1982). Although relationships of GSH levels with motor performance in normal aging have  
336 not been previously investigated, these findings fit with past work that identified relationships  
337 between GSH levels and movement disorders (Choi et al., 2015; Doss et al., 2015; Srinivasan  
338 et al., 2010; Weerasekera et al., 2019; Weiduschat et al., 2014). Together, these findings may  
339 indicate that GSH is providing a compensatory response to increasing oxidative stress and  
340 related tissue damage in the normally aging brain. Higher sensorimotor versus frontal cortex  
341 GSH levels (discussed above) could suggest that the sensorimotor cortex is disproportionately  
342 affected by oxidative stress in older age (and thus requires the largest GSH antioxidant  
343 response). This regionally heightened oxidative stress may then be contributing to these age-  
344 related declines in motor function.

345           Importantly, we identified relationships between motor performance and sensorimotor  
346 but not frontal GSH levels. This suggests regional specificity for these GSH relationships, rather  
347 than poorer motor performance being a consequence of increased oxidative stress throughout  
348 the brain. Moreover, we found no relationship between cortical Glx or GABA levels and these  
349 motor performance metrics, again supporting the specificity of this GSH relationship with motor  
350 behavior for older adults and not result of more general age related shifts in metabolite  
351 concentrations.

352           Although we measured sensorimotor GSH levels over the lower limb cortical  
353 representation, we still identified a GSH relationship with upper limb motor coordination. The  
354 pegboard composite score did not correlate with gait or balance performance, suggesting that it



355 represents a unique motor measure, which independently associates with sensorimotor GSH. It  
356 could be that lower limb sensorimotor GSH levels are related to upper limb sensorimotor GSH  
357 levels; this is probable given that we did not find any associations between motor performance  
358 and frontal GSH levels, and that we found positive correlations between GSH levels across the  
359 two voxels. However, this remains to be examined in future studies.

360         There are several limitations to the present work. We included fewer older adults than  
361 originally anticipated due to the COVID-19 global pandemic; however, based on our power  
362 analysis, we were still adequately powered to test age group differences in GSH. In addition, our  
363 cross-sectional approach precluded us from assessing how GSH levels alter with aging or how  
364 changes in GSH levels across the lifespan relate to declines in motor performance. There is  
365 some evidence that diet may influence MRS-measured GSH levels. One study (Choi et al.,  
366 2015) found an association between dairy consumption and brain GSH levels among older  
367 adults. In the present work, we did not record food intake or restrict diet prior to the MRI scan;  
368 future studies should characterize any effects of diet on brain GSH levels. Finally, other general  
369 limitations of MRS, such as the large voxel size required, are currently unavoidable with this  
370 methodology.

371         These results provide insight into the association between brain aging and oxidative  
372 stress. We demonstrate higher CSF-corrected GSH levels with normal aging, suggesting a GSH  
373 compensatory response to increased oxidative stress with older age. We report higher GSH  
374 levels in the sensorimotor cortex compared to the frontal cortex for both age groups, as well as  
375 multiple associations between sensorimotor CSF-corrected GSH levels (but not GABA or Glx  
376 levels) and poorer balance, gait, and manual dexterity. Together, these results suggest that  
377 MRS-measured GSH could be a marker of neural compensation for increased oxidative stress  
378 with brain aging and also a marker of poorer motor performance. These results could stem from  
379 greater or earlier effects of oxidative stress on the sensorimotor compared to the frontal cortex.



380 **Materials and Methods**

381 The University of Florida's Institutional Review Board provided ethical approval for the  
382 study, and all participants provided their written informed consent at the first testing session.

383 ***Participants***

384 We recruited 37 young and 23 older adults from the Gainesville, FL community.  
385 Exclusion criteria included: history of any neurologic condition (e.g., stroke, Parkinson's disease,  
386 seizures, or a concussion in the last six months) or psychiatric condition (e.g., active depression  
387 or bipolar disorder). We also excluded those who self-reported smoking, consuming more than  
388 two alcoholic drinks per day on average or a history of treatment for alcoholism. All subjects  
389 were screened for magnetic resonance imaging (MRI) eligibility; we excluded those with any  
390 contraindications (e.g., implanted metal, claustrophobia, or pregnancy). All subjects were right-  
391 handed and self-reported an ability to walk unassisted for at least 10 minutes and to stand for at  
392 least 30 seconds with their eyes closed. Participants disclosed all current prescribed and over-  
393 the-counter medications.

394 Prior to enrollment, we screened participants for suspected cognitive impairment over  
395 the phone using the Telephone Interview for Cognitive Status (TICS-M) (de Jager et al., 2003).  
396 We excluded those who scored <21 of 39 points; this is equivalent to scoring <25 points on the  
397 Mini-Mental State Exam (MMSE) and indicates probable cognitive impairment (de Jager et al.,  
398 2003). At the first testing session, participants were re-screened for cognitive impairment using  
399 the Montreal Cognitive Assessment (MoCA) (Nasreddine et al., 2005); we excluded those who  
400 scored <23 of 30 points (Carson et al., 2018).

401 ***Sample Size***

402 Due to the COVID-19 global pandemic, data collection was terminated before we  
403 completed the recruitment of older adult subjects. However, based on a power analysis, 37  
404 young and 23 older adults is more than sufficient for detecting an age difference in MRS-  
405 measured GSH levels. We calculated the minimum necessary sample size using G\*Power 3.1

406 (Erdfelder et al., 1996). We based this calculation on the only past study testing age differences  
407 in MRS-measured GSH (Emir et al., 2011); this study reported an effect size of  $d = 1.65$  for age  
408 differences in occipital cortex GSH levels (Emir et al., 2011). With power = 0.80 and  $\alpha = 0.05$ , a  
409 two-sample independent  $t$ -test (i.e., to characterize group age differences in GSH levels) would  
410 require only six subjects per group.

### 411 **Testing Sessions**

412 Prior to the first session, we collected basic demographic information, including age, sex,  
413 years of education, and medical history, as well as information regarding self-reported exercise,  
414 handedness, and footedness. We also collected basic anthropometric information, such as  
415 height, weight, and leg length.

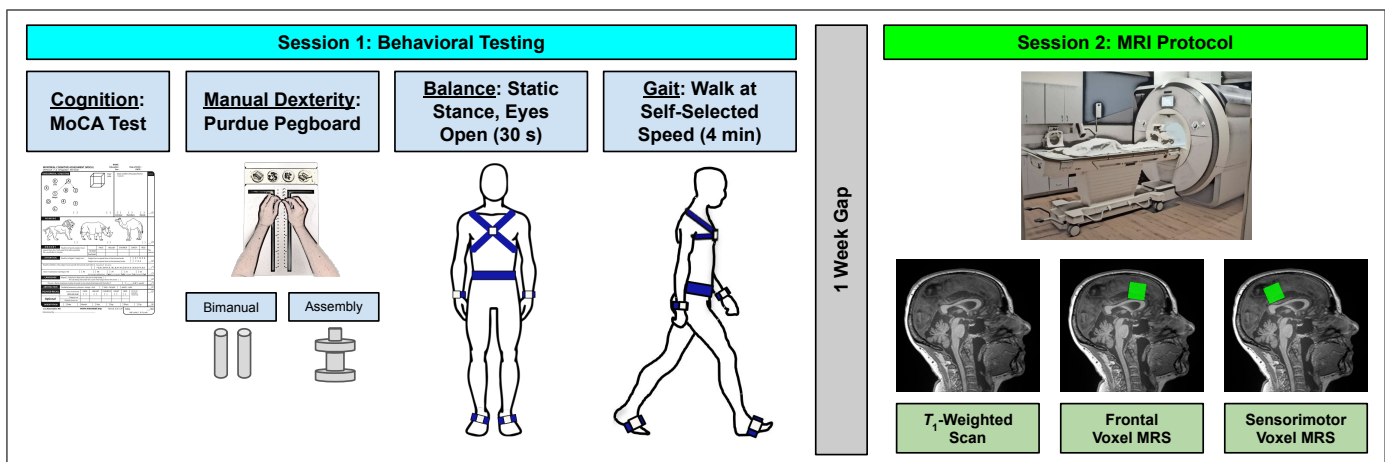

416 **Fig. 5. Methods Overview.** Left. During Session 1, participants first completed the MoCA test of  
417 cognition. Participants then completed two manual dexterity tasks: the Purdue pegboard bimanual and  
418 assembly conditions. Next, participants were instrumented with six IMUs (sensors are pictured in gray  
419 with blue straps) and completed a 30-s balance task in which they stood as still as possible with their  
420 eyes open, gazing at a blank white wall. Subjects then completed a 4-minute walk at a self-selected  
421 speed across a 32-foot room. Right. During Session 2, participants completed an MRI protocol which  
422 included a  $T_1$ -weighted anatomical scan and two edited MRS scans to quantify neurometabolites in a  
423 frontal and sensorimotor voxel.

424

425 Participants then completed behavioral testing, followed by an MRI session

426 approximately one week later (Fig. 5). For 24 hours prior to each session, participants refrained

427 from consuming alcohol, nicotine, or any drugs other than the medications they previously

428 disclosed. At the start of each session, participants completed the Stanford Sleepiness

429 Questionnaire, which asks for the number of hours slept the previous night and for a rating of  
430 current sleepiness (Hoddes et al., 1972).

431 ***Session 1: Behavioral Testing***

432 **MoCA Test**

433 Participants first completed the MoCA (Nasreddine et al., 2005). We added one point to  
434 the scores of participants with  $\leq 12$  years of education (Nasreddine et al., 2005).

435 **Balance Task**

436 Participants completed the four-part Modified Clinical Test of Sensory Interaction in  
437 Balance (m-CTSIB) while instrumented with six Opal inertial measurement units (IMUs; v2;  
438 APDM Wearable Technologies Inc., Portland, OR, USA). IMUs were placed on the feet, wrists,  
439 around the waist at the level of the lumbar spine, and across the torso at the level of the sternal  
440 angle (Fig. 5). Participants stood as still as possible facing a blank white wall for four 30-second  
441 trials: 1) eyes open; 2) eyes closed; 3) eyes open, foam surface; and 4) eyes closed, foam  
442 surface. Here we report only on performance during the eyes open condition. We elected to use  
443 only the eyes-open condition because several subjects had scores greater than  $\pm 3$  standard  
444 deviations from the group mean for the foam conditions; thus, using the eyes-open condition  
445 prevented us from needing to exclude any outlier data. Furthermore, previous work has reported  
446 age differences in postural sway during quiet stance with eyes open (Baloh et al., 1994; Maki et  
447 al., 1990), and eyes open postural sway has been shown to predict falls among older adults  
448 (Fernie et al., 1982; Maki et al., 1990).

449 Inertial data were recorded using MobilityLab software (version 2; APDM Wearable  
450 Technologies Inc., Portland, OR, USA). After each trial, MobilityLab calculated 25  
451 spatiotemporal features of postural sway (Table B1) using the validated iSway algorithm  
452 (Mancini et al., 2012). To condense these variables into several summary metrics, we ran an  
453 exploratory factor analysis (Appendix B). This procedure yielded four factors: anterior/posterior

454 (A/P) sway path, A/P sway speed and variability, M/L sway path, and M/L sway speed and  
455 variability. We then calculated a balance composite score for each factor to use in subsequent  
456 analyses.

#### 457 **Four-Minute Walk**

458 While instrumented with the IMUs, participants also completed an overground walk.  
459 Participants walked back and forth across a 32-foot room for four minutes at whichever pace  
460 they considered to be their “normal walking speed.” Participants were instructed to refrain from  
461 talking, to keep their arms swinging freely at their sides, and to keep their head up and gaze  
462 straight ahead. Each time they reached the end of the room, they completed a 180-degree turn  
463 and walked the length of the room again.

464 After the session, the MobilityLab software calculated 14 spatiotemporal gait variables of  
465 interest (Table C1). The algorithm for calculating these metrics has been validated through  
466 comparison to force plate and motion capture data (see internal validation by MobilityLab:  
467 [https://support.apdm.com/hc/en-us/articles/360000177066-How-are-Mobility-Lab](https://support.apdm.com/hc/en-us/articles/360000177066-How-are-Mobility-Lab-s-algorithms-validated-)  
468 [-s-algorithms-validated-](#) and (Washabaugh et al., 2017)). To obtain summary metrics of gait, we  
469 extracted one variable from each of the four gait domains described by Hollman and colleagues  
470 (Hollman et al., 2011): gait rhythm (cadence (steps/min)), gait phase (stance (% gait cycle)), gait  
471 pace (composite score), and gait variability (composite score). See Appendix B for further  
472 details regarding the selection and calculation of these summary metrics.

#### 473 **Pegboard Tasks**

474 Participants completed two tasks using a Purdue pegboard (Lafayette Instruments,  
475 Lafayette, IN, USA). For the bimanual task, participants had 30 seconds to place as many pegs  
476 as possible into the slots; in this case, participants used both hands at the same time to place  
477 peg pairs (Fig. 5). Scores were based on the number of completed peg pairs. For the assembly  
478 task, participants had one minute to complete as many “assemblies” as possible (Fig. 5). An  
479 assembly consisted of using both hands to piece together metal pins, collars, and washers.

480 Scores were based on the number of completed assemblies. These tasks were selected as they  
481 each require complex coordination of both hands and performance declines with age (Agnew et  
482 al., 1988; Vasylenko et al., 2018). For further analysis, we created a composite score of  
483 pegboard performance by converting the bimanual and assembly scores to standardized Z-  
484 scores and then taking the sum of these two Z-scores.

## 485 **Session 2: MRI Scan**

### 486 **T1 Acquisition**

487 MRI was conducted using a Siemens MAGNETOM Prisma 3T scanner (Siemens  
488 Healthcare, Erlangen, Germany) using a 64-channel head coil. We first collected a 3D  $T_1$ -  
489 weighted anatomical image using a magnetization-prepared rapid gradient-echo (MPRAGE)  
490 sequence for MRS voxel placement and tissue segmentation/correction. The parameters for this  
491 anatomical image were as follows: TR = 2000 ms, TE = 3.06 ms, flip angle =  $8^\circ$ , FOV = 256 x  
492 256 mm<sup>2</sup>, slice thickness = 0.8 mm, 208 slices, voxel size = 0.8 mm<sup>3</sup>.

### 493 **MRS Acquisition**

494 In the following sections and in Table A2, we describe all parameters suggested by the  
495 Magnetic Resonance Spectroscopy quality assessment tool (MRS-Q) (Peek et al., 2020). We  
496 used the universal Hadamard Encoding and Reconstruction of MEGA-Edited Spectroscopy  
497 (HERMES) sequence to simultaneously detect GSH, GABA, and Glx (Saleh et al., 2016; Saleh  
498 et al., 2019). HERMES is a  $J$ -difference editing method that allows for multiple MEGA-PRESS  
499 (Mescher et al., 1998) experiments to be conducted simultaneously. Briefly, the HERMES  
500 sequence includes four sub-experiments containing: A) a dual-lobe editing pulse,  $ON_{GABA} = 1.9$   
501 ppm,  $ON_{GSH} = 4.56$  ppm, and three single-lobe editing pulses: B)  $ON_{GABA} = 1.9$  ppm, C)  $ON_{GSH} =$   
502 4.56 ppm, and D)  $OFF_{GABA}, OFF_{GSH} = 7.5$  ppm. The Hadamard combination A-B+C-D derives  
503 GSH-edited spectra, and A+B-C-D derives GABA+- and Glx-edited spectra. Additional  
504 HERMES parameters included: total acquisition time = 10:48 minutes, TR = 2000 ms, TE = 80  
505 ms, 20-ms editing pulse duration, averages = 320, 2048 data points, 2 kHz spectral width, and

506 variable power and optimized relaxation delays (VAPOR) water suppression. Shimming was  
507 performed using the Siemens interactive shim tool and FAST(EST)MAP (Gruetter, 1993).

508 We collected data from two  $30 \times 30 \times 30 \text{ mm}^3$  voxels in the medial frontal cortex and  
509 bilateral sensorimotor cortex (Fig. 6). We placed the frontal voxel superior to the genu of the  
510 corpus callosum on the mid-sagittal slice. We placed the sensorimotor voxel to align with the  
511 lower limb primary sensorimotor cortex. We aligned the center of this voxel with the posterior  
512 portion of the motor hand knob in the axial view, then centered the voxel on the midline of the  
513 brain, and placed the voxel as superior as possible while still remaining on brain tissue.

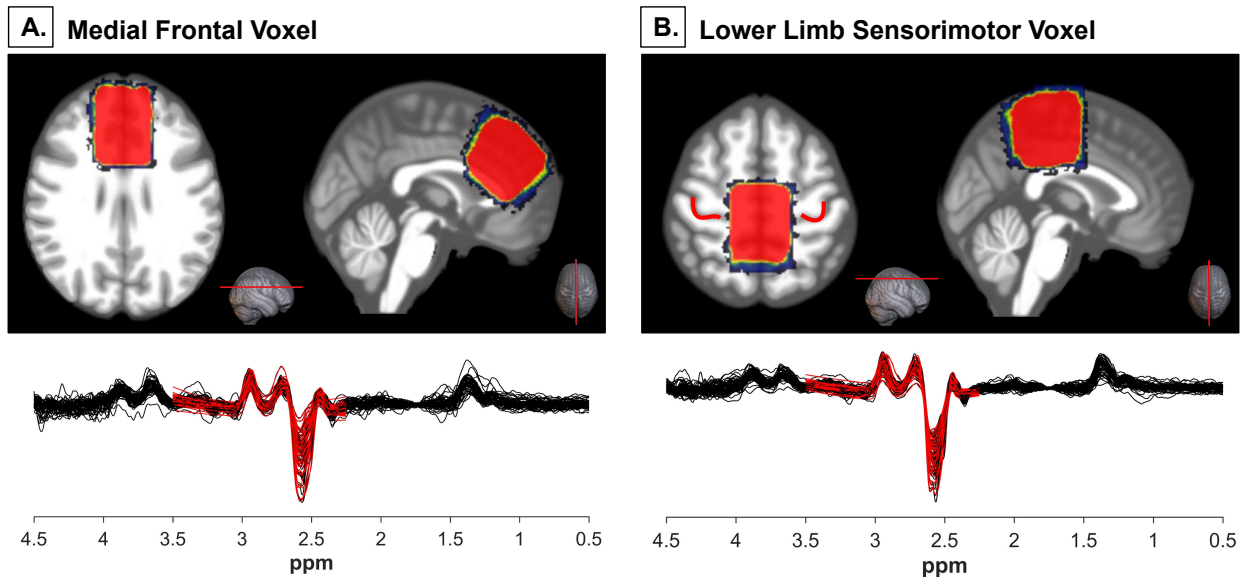

514

515 **Fig. 6. MRS Voxel Placement.** A. Top. Placement of the medial frontal voxel: superior to the genu of the  
516 corpus callosum on the midsagittal line. The voxel shown is every subject's voxel, normalized to standard  
517 space and overlaid onto a template brain. Warmer colors indicate areas of more overlap across subjects.  
518 Bottom. Plot created using `PaperPlot.m` showing all participants' spectra overlaid (black) and the GSH  
519 model fit (red) for the frontal voxel. B. Top. Placement of the sensorimotor voxel: centered with the  
520 posterior portion of the motor hand knobs in the axial view (motor hand knobs are outlined in red), then  
521 centered on the midline of the brain and placed as superior as possible. The voxel shown is every  
522 subject's voxel, normalized to standard space and overlaid onto a template brain. Warmer colors indicate  
523 areas of more overlap across subjects. Bottom. Plot created using `PaperPlot.m` showing all  
524 participants' spectra overlaid (black) and the GSH model fit (red) for the sensorimotor voxel.

525

526

527

528 **MRS Processing**

529           We analyzed MRS data using Gannet (version 3.1.5) (Edden et al., 2014) in MATLAB  
530 (R2019b). First, we ran the *GannetLoad.m* and *GannetFit.m* functions, which include: 1) coil  
531 combination using generalized least squares (An et al., 2013); 2) estimation of the  $B_0$  drift using  
532 the creatine (Cr) signal at 3 ppm; 3) robust spectral registration to minimize subtraction artifacts  
533 (Mikkelsen et al., 2018); 4) Hadamard-combination of the fully processed HERMES sub-spectra  
534 to generate GSH- and GABA+-edited difference spectra; 5) application of the Hankel singular  
535 decomposition water filtering method to remove the residual water signal (Barkhuijsen et al.,  
536 1987); and 6) implementation of a weighted nonlinear regression to model the two difference-  
537 edited signals; here, the neighboring co-edited signals were downweighted to reduce their  
538 impact on modeling errors. The GSH-edited spectrum was modeled between 2.25 and 3.5 ppm  
539 using a Gaussian to model the GSH signal at 2.95 ppm, four Gaussians to model the coedited  
540 aspartyl signals at 2.55 ppm, and a nonlinear baseline.

541           We used *GannetCoRegister.m* to create a binary mask of the MRS voxels and register  
542 these masks to the  $T_1$ -weighted structural image. We then used the Computational Anatomy  
543 Toolbox 12 (CAT12, version 1450) (Gaser & Dahnke, 2016) to segment each subject's  $T_1$ -  
544 weighted image. We implemented *GannetSegment.m*, which uses segmentation results to  
545 determine voxel tissue fractions (i.e., fractions of gray matter, white matter, and CSF) and to  
546 correct GSH estimates for tissue composition (Harris et al., 2015). Correcting for tissue  
547 composition enhances the interpretation of MRS data. Metabolite levels, as well as reference  
548 signals, differ between gray matter, white matter, and CSF (Harris et al., 2015). Tissue  
549 correction is particularly relevant for aging populations (Porges, Woods, Lamb, et al., 2017). For  
550 instance, if older adults have less gray matter due to age-related atrophy in a voxel compared to  
551 young adults, the older adults will also present with less metabolite concentration in that voxel.  
552 Correcting for tissue composition thus permits assessment of whether there are age differences



553 in neurometabolite levels in the tissue that remains in the voxel. Throughout the present work,  
554 we report CSF-corrected GSH levels referenced to water.

### 555 **MRS Exclusions**

556 See Table E1 for details on exclusions of MRS datasets. We excluded MRS datasets if  
557 the GSH fit error (i.e., `GSH.FitError_W`) was greater than 20% or if robust spectral registration  
558 failed for that dataset. We selected 20% for several reasons: 1) datasets with fit errors <20%  
559 passed acceptable visual inspection and 2) fit errors  $\geq 20\%$  were  $>2.5$  standard deviations above  
560 the group mean (i.e.,  $>97$ th percentile). Thus, similar to (Saleh et al., 2020), we selected a  
561 threshold value for data rejection. Of note, we did not exclude one older adult for whom we used  
562 a 20-channel head coil instead of a 64-channel coil due to his large head size. The uncorrected  
563 and CSF-corrected GSH levels for this individual fell within the range of that of the other older  
564 subjects. See Fig. C1 for details.

### 565 ***Statistical Analyses***

566 We conducted all statistical analyses using R (version 4.0.0) (R Core Team, 2013).

### 567 **Age Group Comparisons**

568 For each analysis involving comparisons between the age groups, we first tested the  
569 parametric *t*-test assumptions of normality within each group (using `shapiro.test`) and  
570 homogeneity of variances between the groups (using `leveneTest` in the `car` package (Fox &  
571 Weisberg, 2018)). We then tested age group differences, as described below.

572 Parametric Tests. The majority of MRS variables met the required assumptions, so we  
573 used `t.test` to conduct parametric, independent-samples, two-sided *t*-tests. For each MRS  
574 variable, we report *t*-test results, in addition to group means, standard deviations, and Cohen's *d*  
575 as a measure of effect size.

576 Nonparametric Tests. In several cases (i.e., age differences in demographic information  
577 and cognitive/motor performance), the majority of variables did not meet parametric *t*-test



578 assumptions, so we instead used `wilcox.test` to conduct nonparametric, independent-  
579 samples, two-sided Wilcoxon rank-sum tests for group differences. In these cases, we report  
580 the group medians and interquartile ranges for each demographic variable. We also report  
581 nonparametric effect sizes (Field et al., 2012; Rosenthal et al., 1994); see Appendix F for details  
582 on this calculation. To test for differences in the sex distribution within each age group, we  
583 conducted a Pearson chi-square test using `chisq.test`.

#### 584 **Within-Subject Tests**

585 To examine within-subject differences in MRS variables between the frontal and  
586 sensorimotor voxels, within each age group, we implemented parametric, paired-samples *t*-  
587 tests. These variables met the normality assumption required for parametric paired *t*-tests.

#### 588 **GSH Correlations**

589 We conducted Pearson correlations using `cor.test` to assess the relationship between  
590 frontal and sensorimotor GSH levels. These metrics met the assumptions of linear covariation  
591 and normality. Here we also performed a Fisher *r*-to-*Z* transformation on the correlation  
592 coefficient and then tested for a difference in correlation strength between the age groups using  
593 a one-sided `r.test` in the `psych` package (Revelle, 2014).

#### 594 **GSH Relationships with Cognitive and Motor Performance**

595 For each behavioral metric, we used `lm` to test the relationship between CSF-corrected  
596 GSH levels and performance for both voxels and age groups. For the MoCA score models, we  
597 controlled for sex and years of education (Malek-Ahmadi et al., 2015). For the balance and gait  
598 models, we controlled for sex and leg length, as these each affect postural sway (e.g., (Kim et  
599 al., 2010)) and gait (e.g., (Ko et al., 2011; Kobayashi et al., 2016; Samson et al., 2001)). For the  
600 manual dexterity model, we controlled for sex, as there is some evidence of sex differences in  
601 Purdue pegboard performance (Vasylenko et al., 2018).

602 We also computed the partial correlation for each GSH-performance relationship (i.e.,  
603 the correlation controlling for the covariates listed above) by correlating the residuals from 1)  
604 regressing each of the covariates (but not GSH concentration) onto the performance variable,  
605 and 2) regressing each of the covariates onto GSH concentration. Finally, as described above,  
606 we used a Fisher  $r$ -to- $Z$  transformation to test for age differences in the strength of the partial  
607 correlation. As several variables did not meet the linear regression assumptions of  
608 heteroscedasticity and normality, for each model that yielded a significant GSH-performance  
609 relationship, we also ran a nonparametric version of that model using `npreg` and `npsigtest` in  
610 the `np` package (Hayfield & Racine, 2008).

611 As noted in the Results section, we reran the gait variability model including gait speed  
612 as an additional covariate because there is some evidence that walking speed contributes to  
613 gait variability (e.g., (Jordan et al., 2007)). Further, for each model that indicated a significant  
614 relationship between GSH levels and behavior, we reran the model also including GABA and  
615 Glx as covariates. This was to provide further support for the specificity of the relationship  
616 between GSH levels and motor performance; that is, we hypothesized that these  
617 neurometabolites would not relate to behavior, and that including these would not influence the  
618 significant relationship between GSH levels and motor performance.

### 619 **Corrections for Multiple Comparisons**

620 We corrected  $p$ -values within each results table using `p.adjust with method = "bh"`  
621 to apply the Benjamini-Hochberg FDR correction (Benjamini & Hochberg, 1995). We present the  
622 uncorrected  $p$ -values within the tables and describe in the table footnote if any  $p$ -values did not  
623 pass the FDR correction. With the exception of two cases in which the  $p$ -values were  $p < 0.10$ ,  
624 all other results remained significant ( $p < 0.05$ ) after applying the FDR correction for multiple  
625 comparisons.

626 **Acknowledgements**

627           During completion of this work, KH was supported by a National Science Foundation  
628 Graduate Research Fellowship under Grant no. DGE-1315138 and DGE-1842473 and by  
629 NINDS training grant T32-NS082128. EP was supported by NIAAA grant K01 AA025306 and  
630 the McKnight Brain Research Foundation; the Center for Cognitive Aging and Memory at the  
631 University of Florida. A portion of this work was performed in the McKnight Brain Institute at the  
632 National High Magnetic Field Laboratory's Advanced Magnetic Resonance Imaging and  
633 Spectroscopy (AMRIS) Facility, which is supported by National Science Foundation Cooperative  
634 Agreement No. DMR-1644779 and the State of Florida. This work was also supported in part by  
635 an NIH award, S10OD021726, for High End Instrumentation. This study applied tools developed  
636 under NIH grants R01 EB016089, R01 EB023963 and P41 EB015909.

637           The authors wish to thank Aakash Anandjiwala, Justin Geraghty, and Alexis Jennings-  
638 Coulibaly for their help in subject recruitment and data collection. The authors also wish to thank  
639 all of the participants who volunteered their time, as well as the McKnight Brain Institute MRI  
640 technologists, without whom this project would not have been possible.

641 **Author Contributions**

642           KH participated in initial study design, collected all data, processed the MRS data,  
643 conducted the statistical analyses, created the figures, and wrote the manuscript. HH  
644 contributed to manuscript writing and results interpretation. PAJ assisted with data collection,  
645 data processing, and manuscript preparation. MM advised on MRS data processing and  
646 methods, in addition to contributing to manuscript preparation. CH consulted on the design and  
647 analysis of the motor performance tests. RE advised on MRS data acquisition, processing,  
648 interpretation, and manuscript preparation. RS and EP oversaw study design and led the  
649 interpretation and discussion of results. All authors participated in revision of the manuscript.

650 **Competing Interests**

651           The authors declare no competing interests.

References

- 652  
653
- 654 Agnew, J., Bolla-Wilson, K., Kawas, C. H., & Bleecker, M. L. (1988). Purdue pegboard age and  
655 sex norms for people 40 years old and older. *Developmental Neuropsychology*, 4(1), 29-35.
- 656 Aluf, Y., Vaya, J., Khatib, S., Loboda, Y., Kizhner, S., & Finberg, J. P. (2010). Specific oxidative  
657 stress profile associated with partial striatal dopaminergic depletion by 6-hydroxydopamine as  
658 assessed by a novel multifunctional marker molecule. *Free Radical Research*, 44(6), 635-644.
- 659 An, L., Willem van der Veen, J., Li, S., Thomasson, D. M., & Shen, J. (2013). Combination of  
660 multichannel single voxel MRS signals using generalized least squares. *Journal of Magnetic  
661 Resonance Imaging*, 37(6), 1445-1450.
- 662 Anstey, K. J., & Low, L.-F. (2004). Normal cognitive changes in aging. *Australian Family  
663 Physician*, 33(10), 783.
- 664 Asuncion, J. G. D. L., Millan, A., Pla, R., Bruseghini, L., Esteras, A., Pallardo, F. V., . . . Viña, J.  
665 (1996). Mitochondrial glutathione oxidation correlates with age associated oxidative damage to  
666 mitochondrial DNA. *The FASEB Journal*, 10(2), 333-338.
- 667 Baloh, R. W., Fife, T. D., Zwerling, L., Socotch, T., Jacobson, K., Bell, T., & Beykirch, K. (1994).  
668 Comparison of static and dynamic posturography in young and older normal people. *Journal of  
669 the American Geriatrics Society*, 42(4), 405-412.
- 670 Barkhuijsen, H., De Beer, R., & Van Ormondt, D. (1987). Improved algorithm for noniterative  
671 time-domain model fitting to exponentially damped magnetic resonance signals. *Journal of  
672 Magnetic Resonance*, 73(3), 553-557.
- 673 Bartlett, M. S. (1937). The statistical conception of mental factors. *British Journal of Psychology*,  
674 28(1), 97.
- 675 Baxter, P. S., & Hardingham, G. E. (2016). Adaptive regulation of the brain's antioxidant  
676 defences by neurons and astrocytes. *Free Radical Biology and Medicine*, 100, 147-152.
- 677 Benjamini, Y., & Hochberg, Y. (1995). Controlling the false discovery rate: A practical and  
678 powerful approach to multiple testing. *Journal of the Royal Statistical Society: Series B  
679 (Methodological)*, 57(1), 289-300.
- 680 Brawek, B., Löffler, M., Wagner, K., Huppertz, H.-J., Wendling, A.-S., Weyerbrock, A., . . .  
681 Feuerstein, T. J. (2010). Reactive oxygen species (ROS) in the human neocortex: Role of aging  
682 and cognition. *Brain Research Bulletin*, 81(4-5), 484-490.
- 683 Calabrese, V., Scapagnini, G., Ravagna, A., Fariello, R. G., Giuffrida Stella, A., & Abraham, N.  
684 (2002). Regional distribution of heme oxygenase, HSP70, and glutathione in brain: Relevance  
685 for endogenous oxidant/antioxidant balance and stress tolerance. *Journal of Neuroscience  
686 Research*, 68(1), 65-75.
- 687 Carson, N., Leach, L., & Murphy, K. J. (2018). A re examination of Montreal Cognitive  
688 Assessment (MoCA) cutoff scores. *International Journal of Geriatric Psychiatry*, 33(2), 379-388.

- 689 Chakrabarti, S., Munshi, S., Banerjee, K., Thakurta, I. G., Sinha, M., & Bagh, M. B. (2011).  
690 Mitochondrial dysfunction during brain aging: Role of oxidative stress and modulation by  
691 antioxidant supplementation. *Aging and Disease*, 2(3), 242.
- 692 Chen, T. S., Richie Jr, J. P., & Lang, C. A. (1989). The effect of aging on glutathione and  
693 cysteine levels in different regions of the mouse brain. *Proceedings of the Society for*  
694 *Experimental Biology and Medicine*, 190(4), 399-402.
- 695 Chiang, G. C., Mao, X., Kang, G., Chang, E., Pandya, S., Vallabhajosula, S., . . . Initiative, A. S.  
696 D. N. (2017). Relationships among cortical glutathione levels, brain amyloidosis, and memory in  
697 healthy older adults investigated in vivo with 1H-MRS and Pittsburgh compound-B PET.  
698 *American Journal of Neuroradiology*, 38(6), 1130-1137.
- 699 Choi, I.-Y., Lee, P., Denney, D. R., Spaeth, K., Nast, O., Ptomey, L., . . . Sullivan, D. K. (2015).  
700 Dairy intake is associated with brain glutathione concentration in older adults. *The American*  
701 *Journal of Clinical Nutrition*, 101(2), 287-293.
- 702 Choi, I.-Y., Lee, S., Denney, D. R., & Lynch, S. G. (2011). Lower levels of glutathione in the  
703 brains of secondary progressive multiple sclerosis patients measured by 1H magnetic  
704 resonance chemical shift imaging at 3 T. *Multiple Sclerosis Journal*, 17(3), 289-296.
- 705 Cleeland, C., Pipingas, A., Scholey, A., & White, D. (2019). Neurochemical changes in the aging  
706 brain: A systematic review. *Neuroscience & Biobehavioral Reviews*, 98, 306-319.
- 707 Davis, S. W., Dennis, N. A., Daselaar, S. M., Fleck, M. S., & Cabeza, R. (2008). Que PASA?  
708 The posterior–anterior shift in aging. *Cerebral Cortex*, 18(5), 1201-1209.
- 709 de Jager, C. A., Budge, M. M., & Clarke, R. (2003). Utility of TICS M for the assessment of  
710 cognitive function in older adults. *International Journal of Geriatric Psychiatry*, 18(4), 318-324.
- 711 Di Toro, C., Di Toro, P., Zieher, L., & Guelman, L. (2007). Sensitivity of cerebellar glutathione  
712 system to neonatal ionizing radiation exposure. *Neurotoxicology*, 28(3), 555-561.
- 713 Díaz-Hung, M.-L., Blanco, L., Pavón, N., León, R., Estupiñan, B., Orta, E., . . . Fernández, I.  
714 (2014). Sensory-motor performance after acute glutathione depletion by L-buthionine  
715 sulfoximine injection into substantia nigra pars compacta. *Behavioural Brain Research*, 271,  
716 286-293.
- 717 DiStefano, C., Zhu, M., & Mindrila, D. (2009). Understanding and using factor scores:  
718 Considerations for the applied researcher. *Practical Assessment, Research, and Evaluation*,  
719 14(1), 20.
- 720 Doss, S., Rinnenthal, J. L., Schmitz-Hübsch, T., Brandt, A. U., Papazoglou, S., Lux, S., . . .  
721 Klockgether, T. (2015). Cerebellar neurochemical alterations in spinocerebellar ataxia type 14  
722 appear to include glutathione deficiency. *Journal of Neurology*, 262(8), 1927-1935.
- 723 Downs, S., Marquez, J., & Chiarelli, P. (2014). Normative scores on the Berg Balance Scale  
724 decline after age 70 years in healthy community-dwelling people: A systematic review. *Journal*  
725 *of Physiotherapy*, 60(2), 85-89.

- 726 Dringen, R. (2000). Metabolism and functions of glutathione in brain. *Progress in Neurobiology*,  
727 62(6), 649-671.
- 728 Duffy, S. L., Lagopoulos, J., Hickie, I. B., Diamond, K., Graeber, M. B., Lewis, S. J., & Naismith,  
729 S. L. (2014). Glutathione relates to neuropsychological functioning in mild cognitive impairment.  
730 *Alzheimer's & Dementia*, 10(1), 67-75.
- 731 Dwivedi, D., Megha, K., Mishra, R., & Mandal, P. K. (2020). Glutathione in brain: Overview of Its  
732 conformations, functions, biochemical characteristics, quantitation and potential therapeutic role  
733 in brain disorders. *Neurochemical Research*, 1-20.
- 734 Edden, R. A., Puts, N. A., Harris, A. D., Barker, P. B., & Evans, C. J. (2014). Gannet: A batch-  
735 processing tool for the quantitative analysis of gamma-aminobutyric acid-edited MR  
736 spectroscopy spectra. *Journal of Magnetic Resonance Imaging*, 40(6), 1445-1452.
- 737 Elias, L. J., Bryden, M. P., & Bulman-Fleming, M. B. (1998). Footedness is a better predictor  
738 than is handedness of emotional lateralization. *Neuropsychologia*, 36(1), 37-43.
- 739 Emir, U. E., Raatz, S., McPherson, S., Hodges, J. S., Torkelson, C., Tawfik, P., . . . Terpstra, M.  
740 (2011). Noninvasive quantification of ascorbate and glutathione concentration in the elderly  
741 human brain. *NMR in Biomedicine*, 24(7), 888-894.
- 742 Erdfelder, E., Faul, F., & Buchner, A. (1996). GPOWER: A general power analysis program.  
743 *Behavior Research Methods, Instruments, & Computers*, 28(1), 1-11.
- 744 Falconer, J., Hughes, S. L., Naughton, B. J., Singer, R., Chang, R. W., & Sinacore, J. M. (1991).  
745 Self report and performance-based hand function tests as correlates of dependency in the  
746 elderly. *Journal of the American Geriatrics Society*, 39(7), 695-699.
- 747 Fernie, G. R., Gryfe, C., Holliday, P. J., & Llewellyn, A. (1982). The relationship of postural sway  
748 in standing to the incidence of falls in geriatric subjects. *Age and Ageing*, 11(1), 11-16.
- 749 Field, A., Miles, J., & Field, Z. (2012). *Discovering Statistics Using R*: Sage publications.
- 750 Fox, J., & Weisberg, S. (2018). *An R Companion to Applied Regression*: Sage publications.
- 751 Gaser, C., & Dahnke, R. (2016). CAT-a computational anatomy toolbox for the analysis of  
752 structural MRI data. *Human Brain Mapping*, 2016, 336-348.
- 753 Gegg, M., Beltran, B., Salas-Pino, S., Bolanos, J., Clark, J., Moncada, S., & Heales, S. (2003).  
754 Differential effect of nitric oxide on glutathione metabolism and mitochondrial function in  
755 astrocytes and neurones: Implications for neuroprotection/neurodegeneration? *Journal of*  
756 *Neurochemistry*, 86(1), 228-237.
- 757 Godin, G., & Shephard, R. (1985). A simple method to assess exercise behavior in the  
758 community. *Canadian Journal of Applied Sport Sciences*, 10(3), 141-146.
- 759 Godlewska, B. R., Yip, S. W., Near, J., Goodwin, G. M., & Cowen, P. J. (2014). Cortical  
760 glutathione levels in young people with bipolar disorder: A pilot study using magnetic resonance  
761 spectroscopy. *Psychopharmacology*, 231(2), 327-332.



- 762 González-Fraguela, M. E., Blanco, L., Fernández, C. I., Lorigados, L., Serrano, T., &  
763 Fernández, J. L. (2018). Glutathione depletion: Starting point of brain metabolic stress,  
764 neuroinflammation and cognitive impairment in rats. *Brain Research Bulletin*, 137, 120-131.
- 765 Gruetter, R. (1993). Automatic, localized in vivo adjustment of all first–and second–order shim  
766 coils. *Magnetic Resonance in Medicine*, 29(6), 804-811.
- 767 Harman, D. (1955). Aging: A theory based on free radical and radiation chemistry.
- 768 Harold, C., Wallace, T., Friedman, R., Gudelsky, G., & Yamamoto, B. (2000).  
769 Methamphetamine selectively alters brain glutathione. *European Journal of Pharmacology*,  
770 400(1), 99-102.
- 771 Harris, A. D., Puts, N. A., & Edden, R. A. (2015). Tissue correction for GABA–edited MRS:  
772 Considerations of voxel composition, tissue segmentation, and tissue relaxations. *Journal of*  
773 *Magnetic Resonance Imaging*, 42(5), 1431-1440.
- 774 Hausdorff, J. M., Rios, D. A., & Edelberg, H. K. (2001). Gait variability and fall risk in community-  
775 living older adults: a 1-year prospective study. *Archives of Physical Medicine and Rehabilitation*,  
776 82(8), 1050-1056.
- 777 Hayfield, T., & Racine, J. S. (2008). Nonparametric econometrics: The np package. *Journal of*  
778 *Statistical Software*, 27(5), 1-32.
- 779 Hoddes, E., Zarcone, V., & Dement, W. (1972). Stanford sleepiness scale. *Enzyklopädie der*  
780 *Schlafmedizin*, 1184.
- 781 Hoffman, D. J., Spalding, M. G., & Frederick, P. C. (2005). Subchronic effects of methylmercury  
782 on plasma and organ biochemistries in great egret nestlings. *Environmental Toxicology and*  
783 *Chemistry: An International Journal*, 24(12), 3078-3084.
- 784 Hollman, J. H., McDade, E. M., & Petersen, R. C. (2011). Normative spatiotemporal gait  
785 parameters in older adults. *Gait & Posture*, 34(1), 111-118.
- 786 Huang, J., & Philbert, M. A. (1995). Distribution of glutathione and glutathione-related enzyme  
787 systems in mitochondria and cytosol of cultured cerebellar astrocytes and granule cells. *Brain*  
788 *Research*, 680(1-2), 16-22.
- 789 Hussain, S., Slikker Jr, W., & Ali, S. (1995). Age–related changes in antioxidant enzymes,  
790 superoxide dismutase, catalase, glutathione peroxidase and glutathione in different regions of  
791 mouse brain. *International Journal of Developmental Neuroscience*, 13(8), 811-817.
- 792 Hyder, F., Fulbright, R. K., Shulman, R. G., & Rothman, D. L. (2013). Glutamatergic function in  
793 the resting awake human brain is supported by uniformly high oxidative energy. *Journal of*  
794 *Cerebral Blood Flow & Metabolism*, 33(3), 339-347.
- 795 Itoh, K., Wakabayashi, N., Katoh, Y., Ishii, T., Igarashi, K., Engel, J. D., & Yamamoto, M. (1999).  
796 Keap1 represses nuclear activation of antioxidant responsive elements by Nrf2 through binding  
797 to the amino-terminal Neh2 domain. *Genes & Development*, 13(1), 76-86.

- 798 Jockwitz, C., Mérillat, S., Liem, F., Oschwald, J., Amunts, K., Caspers, S., & Jäncke, L. (2019).  
799 Generalizing age effects on brain structure and cognition: A two□study comparison approach.  
800 *Human Brain Mapping, 40*(8), 2305-2319.
- 801 Jordan, K., Challis, J. H., & Newell, K. M. (2007). Walking speed influences on gait cycle  
802 variability. *Gait & Posture, 26*(1), 128-134.
- 803 Kim, J., Eom, G. M., Kim, C. S., Kim, D. H., Lee, J. H., Park, B. K., & Hong, J. (2010). Sex  
804 differences in the postural sway characteristics of young and elderly subjects during quiet  
805 natural standing. *Geriatrics & Gerontology International, 10*(2), 191-198.
- 806 Ko, S.-u., Tolea, M. I., Hausdorff, J. M., & Ferrucci, L. (2011). Sex-specific differences in gait  
807 patterns of healthy older adults: Results from the Baltimore Longitudinal Study of Aging. *Journal*  
808 *of Biomechanics, 44*(10), 1974-1979.
- 809 Kobayashi, Y., Hobara, H., Helderdoorn, T. A., Kouchi, M., & Mochimaru, M. (2016). Age-  
810 independent and age-dependent sex differences in gait pattern determined by principal  
811 component analysis. *Gait & Posture, 46*, 11-17.
- 812 Langeveld, C. H., Schepens, E., Jongenelen, C., Stoof, J. C., Hjelle, O. P., Ottersen, O. P., &  
813 Drukarch, B. (1996). Presence of glutathione immunoreactivity in cultured neurones and  
814 astrocytes. *Neuroreport, 7*(11), 1833-1836.
- 815 Liu, R. M. (2002). Down-regulation of  $\gamma$ -glutamylcysteine synthetase regulatory subunit gene  
816 expression in rat brain tissue during aging. *Journal of Neuroscience Research, 68*(3), 344-351.
- 817 Maher, P. (2005). The effects of stress and aging on glutathione metabolism. *Ageing Research*  
818 *Reviews, 4*(2), 288-314.
- 819 Maki, B. E., Holliday, P. J., & Fernie, G. R. (1990). Aging and postural control: A comparison of  
820 spontaneous-and induced-sway balance tests. *Journal of the American Geriatrics Society,*  
821 *38*(1), 1-9.
- 822 Maki, B. E., Holliday, P. J., & Topper, A. K. (1994). A prospective study of postural balance and  
823 risk of falling in an ambulatory and independent elderly population. *Journal of Gerontology,*  
824 *49*(2), M72-M84.
- 825 Malek-Ahmadi, M., Powell, J. J., Belden, C. M., O'Connor, K., Evans, L., Coon, D. W., & Nieri,  
826 W. (2015). Age-and education-adjusted normative data for the Montreal Cognitive Assessment  
827 (MoCA) in older adults age 70–99. *Aging, Neuropsychology, and Cognition, 22*(6), 755-761.
- 828 Mancini, M., Salarian, A., Carlson-Kuhta, P., Zampieri, C., King, L., Chiari, L., & Horak, F. B.  
829 (2012). iSway: A sensitive, valid and reliable measure of postural control. *Journal of*  
830 *Neuroengineering and Rehabilitation, 9*(1), 59.
- 831 Mandal, P. K., Saharan, S., Tripathi, M., & Murari, G. (2015). Brain glutathione levels—A novel  
832 biomarker for mild cognitive impairment and Alzheimer's disease. *Biological Psychiatry, 78*(10),  
833 702-710.
- 834 Mandal, P. K., Tripathi, M., & Sugunan, S. (2012). Brain oxidative stress: Detection and  
835 mapping of anti-oxidant marker 'Glutathione' in different brain regions of healthy male/female,



- 836 MCI and Alzheimer patients using non-invasive magnetic resonance spectroscopy. *Biochemical*  
837 *and Biophysical Research Communications*, 417(1), 43-48.
- 838 Marjańska, M., McCarten, J. R., Hodges, J., Hemmy, L. S., Grant, A., Deelchand, D. K., &  
839 Terpstra, M. (2017). Region-specific aging of the human brain as evidenced by neurochemical  
840 profiles measured noninvasively in the posterior cingulate cortex and the occipital lobe using 1H  
841 magnetic resonance spectroscopy at 7 T. *Neuroscience*, 354, 168-177.
- 842 Matsuzawa, D., Obata, T., Shirayama, Y., Nonaka, H., Kanazawa, Y., Yoshitome, E., . . .  
843 Ikehira, H. (2008). Negative correlation between brain glutathione level and negative symptoms  
844 in schizophrenia: A 3T 1 H-MRS study. *PloS One*, 3(4), e1944.
- 845 Mescher, M., Merkle, H., Kirsch, J., Garwood, M., & Gruetter, R. (1998). Simultaneous in vivo  
846 spectral editing and water suppression. *NMR in Biomedicine: An International Journal Devoted*  
847 *to the Development and Application of Magnetic Resonance In Vivo*, 11(6), 266-272.
- 848 Michels, L., Schulte-Vels, T., Schick, M., O’Gorman, R. L., Zeffiro, T., Hasler, G., & Mueller-  
849 Pfeiffer, C. (2014). Prefrontal GABA and glutathione imbalance in posttraumatic stress disorder:  
850 preliminary findings. *Psychiatry Research: Neuroimaging*, 224(3), 288-295.
- 851 Mikkelsen, M., Barker, P. B., Bhattacharyya, P. K., Brix, M. K., Buur, P. F., Cecil, K. M., . . .  
852 Cuypers, K. (2017). Big GABA: Edited MR spectroscopy at 24 research sites. *NeuroImage*, 159,  
853 32-45.
- 854 Mikkelsen, M., Saleh, M. G., Near, J., Chan, K. L., Gong, T., Harris, A. D., . . . Wilkinson, I. D.  
855 (2018). Frequency and phase correction for multiplexed edited MRS of GABA and glutathione.  
856 *Magnetic Resonance in Medicine*, 80(1), 21-28.
- 857 Mythri, R. B., Venkateshappa, C., Harish, G., Mahadevan, A., Muthane, U. B., Yasha, T., . . .  
858 Shankar, S. (2011). Evaluation of markers of oxidative stress, antioxidant function and astrocytic  
859 proliferation in the striatum and frontal cortex of Parkinson’s disease brains. *Neurochemical*  
860 *Research*, 36(8), 1452-1463.
- 861 Nasreddine, Z. S., Phillips, N. A., Bédirian, V., Charbonneau, S., Whitehead, V., Collin, I., . . .  
862 Chertkow, H. (2005). The Montreal Cognitive Assessment, MoCA: A brief screening tool for mild  
863 cognitive impairment. *Journal of the American Geriatrics Society*, 53(4), 695-699.
- 864 Nezhad, F. S., Anton, A., Parkes, L. M., Deakin, B., & Williams, S. R. (2017). Quantification of  
865 glutathione in the human brain by MR spectroscopy at 3 Tesla: Comparison of PRESS and  
866 MEGA-PRESS. *Magnetic Resonance in Medicine*, 78(4), 1257.
- 867 Oeltzschner, G., Wijtenburg, S. A., Mikkelsen, M., Edden, R. A., Barker, P. B., Joo, J. H., . . .  
868 Smith, G. S. (2019). Neurometabolites and associations with cognitive deficits in mild cognitive  
869 impairment: A magnetic resonance spectroscopy study at 7 Tesla. *Neurobiology of Aging*, 73,  
870 211-218.
- 871 Oldfield, R. C. (1971). The assessment and analysis of handedness: The Edinburgh Inventory.  
872 *Neuropsychologia*, 9(1), 97-113.

- 873 Ong, W., Hu, C., Hjelle, O., Ottersen, O., & Halliwell, B. (2000). Changes in glutathione in the  
874 hippocampus of rats injected with kainate: depletion in neurons and upregulation in glia.  
875 *Experimental Brain Research*, 132(4), 510-516.
- 876 Peek, A. L., Rebbeck, T., Puts, N. A., Watson, J., Aguila, M.-E. R., & Leaver, A. M. (2020). Brain  
877 GABA and glutamate levels across pain conditions: A systematic literature review and meta-  
878 analysis of 1H-MRS studies using the MRS-Q quality assessment tool. *NeuroImage*, 210,  
879 116532.
- 880 Pelvig, D. P., Pakkenberg, H., Stark, A. K., & Pakkenberg, B. (2008). Neocortical glial cell  
881 numbers in human brains. *Neurobiology of Aging*, 29(11), 1754-1762.
- 882 Perry, T., Berry, K., Hansen, S., Diamond, S., & Mok, C. (1971). Regional distribution of amino  
883 acids in human brain obtained at autopsy. *Journal of Neurochemistry*, 18(3), 513-519.
- 884 Perry, T., Hansen, S., & Gandham, S. S. (1981). Postmortem changes of amino compounds in  
885 human and rat brain. *Journal of Neurochemistry*, 36(2), 406-412.
- 886 Piccinelli, M. (1998). Alcohol Use Disorders Identification Test (AUDIT). *Epidemiologia e*  
887 *Psichiatria Sociale*, 7, 70-73.
- 888 Porges, E. C., Woods, A. J., Edden, R. A., Puts, N. A., Harris, A. D., Chen, H., . . . Williamson,  
889 J. B. (2017). Frontal gamma-aminobutyric acid concentrations are associated with cognitive  
890 performance in older adults. *Biological Psychiatry: Cognitive Neuroscience and Neuroimaging*,  
891 2(1), 38-44.
- 892 Porges, E. C., Woods, A. J., Lamb, D. G., Williamson, J. B., Cohen, R. A., Edden, R. A., &  
893 Harris, A. D. (2017). Impact of tissue correction strategy on GABA-edited MRS findings.  
894 *NeuroImage*, 162, 249-256.
- 895 Quastel, J. H., & Wheatley, A. H. M. (1932). Oxidations by the brain. *Biochemical Journal*, 26(3),  
896 725-744.
- 897 R Core Team. (2013). R: A language and environment for statistical computing: Vienna, Austria.
- 898 Rae, C. D., & Williams, S. R. (2017). Glutathione in the human brain: Review of its roles and  
899 measurement by magnetic resonance spectroscopy. *Analytical Biochemistry*, 529, 127-143.
- 900 Rantakokko, M., Mänty, M., & Rantanen, T. (2013). Mobility decline in old age. *Exercise and*  
901 *Sport Sciences Reviews*, 41(1), 19-25.
- 902 Raps, S. P., Lai, J. C., Hertz, L., & Cooper, A. J. (1989). Glutathione is present in high  
903 concentrations in cultured astrocytes but not in cultured neurons. *Brain Research*, 493(2), 398-  
904 401.
- 905 Revelle, W. (2014). psych: Procedures for psychological, psychometric, and personality  
906 research. *Northwestern University, Evanston, Illinois*, 165, 1-10.
- 907 Rice, M., Forman, R., Chen, B., Avshalumov, M., Cragg, S., & Drew, K. (2002). Brain  
908 antioxidant regulation in mammals and anoxia-tolerant reptiles: Balanced for neuroprotection

- 909 and neuromodulation. *Comparative Biochemistry and Physiology Part C: Toxicology &*  
910 *Pharmacology*, 133(4), 515-525.
- 911 Rice, M., & Russo-Menna, I. (1997). Differential compartmentalization of brain ascorbate and  
912 glutathione between neurons and glia. *Neuroscience*, 82(4), 1213-1223.
- 913 Rodríguez Navarro, J. A., Casarejos, M. J., Menéndez, J., Solano, R. M., Rodal, I., Gómez, A., .  
914 . . Mena, M. A. (2007). Mortality, oxidative stress and tau accumulation during ageing in parkin  
915 null mice. *Journal of Neurochemistry*, 103(1), 98-114.
- 916 Rosenthal, R., Cooper, H., & Hedges, L. (1994). Parametric measures of effect size. *The*  
917 *Handbook of Research Synthesis*, 621(2), 231-244.
- 918 Sagara, J. i., Makino, N., & Bannai, S. (1996). Glutathione efflux from cultured astrocytes.  
919 *Journal of Neurochemistry*, 66(5), 1876-1881.
- 920 Saleh, M. G., Oeltzschner, G., Chan, K. L., Puts, N. A., Mikkelsen, M., Schär, M., . . . Edden, R.  
921 A. (2016). Simultaneous edited MRS of GABA and glutathione. *NeuroImage*, 142, 576-582.
- 922 Saleh, M. G., Papantoni, A., Mikkelsen, M., Hui, S., Oeltzschner, G., Puts, N., . . . Carnell, S.  
923 (2020). Effect of Age on GABA+ and Glutathione in a Pediatric Sample. *American Journal of*  
924 *Neuroradiology*, 41(6), 1099-1104.
- 925 Saleh, M. G., Rimbault, D., Mikkelsen, M., Oeltzschner, G., Wang, A. M., Jiang, D., . . . Noeske,  
926 R. (2019). Multi-vendor standardized sequence for edited magnetic resonance spectroscopy.  
927 *NeuroImage*, 189, 425-431.
- 928 Samson, M. M., Crowe, A., De Vreede, P., Dessens, J. A., Duursma, S. A., & Verhaar, H. J.  
929 (2001). Differences in gait parameters at a preferred walking speed in healthy subjects due to  
930 age, height and body weight. *Aging Clinical and Experimental Research*, 13(1), 16-21.
- 931 Sasaki, T., Senda, M., Kim, S.-n., Kojima, S., & Kubodera, A. (2001). Age-related changes of  
932 glutathione content, glucose transport and metabolism, and mitochondrial electron transfer  
933 function in mouse brain. *Nuclear Medicine and Biology*, 28(1), 25-31.
- 934 Seidler, R. D., & Stelmach, G. E. (1995). Reduction in sensorimotor control with age. *Quest*,  
935 47(3), 386-394.
- 936 Sekhar, K. R., Rachakonda, G., & Freeman, M. L. (2010). Cysteine-based regulation of the  
937 CUL3 adaptor protein Keap1. *Toxicology and Applied Pharmacology*, 244(1), 21-26.
- 938 Smith, A. M., Zeve, D. R., Grisel, J. J., & Chen, W.-J. A. (2005). Neonatal alcohol exposure  
939 increases malondialdehyde (MDA) and glutathione (GSH) levels in the developing cerebellum.  
940 *Developmental Brain Research*, 160(2), 231-238.
- 941 Srinivasan, R., Ratiney, H., Hammond-Rosenbluth, K. E., Pelletier, D., & Nelson, S. J. (2010).  
942 MR spectroscopic imaging of glutathione in the white and gray matter at 7 T with an application  
943 to multiple sclerosis. *Magnetic Resonance Imaging*, 28(2), 163-170.

- 944 Stel, V. S., Smit, J. H., Pluijm, S. M., & Lips, P. (2003). Balance and mobility performance as  
945 treatable risk factors for recurrent falling in older persons. *Journal of Clinical Epidemiology*,  
946 56(7), 659-668.
- 947 Taubert, M., Roggenhofer, E., Melie-Garcia, L., Muller, S., Lehmann, N., Preisig, M., . . . Kherif,  
948 F. (2020). Converging patterns of aging-associated brain volume loss and tissue microstructure  
949 differences. *Neurobiology of Aging*, 88, 108-118.
- 950 Tchantchou, F., Graves, M., Rogers, E., Ortiz, D., & Shea, T. B. (2005). N-acetyl cysteine  
951 alleviates oxidative damage to central nervous system of ApoE-deficient mice following folate  
952 and vitamin E-deficiency. *Journal of Alzheimer's Disease*, 7(2), 135-138.
- 953 Tkac, I., Dubinsky, J. M., Keene, C. D., Gruetter, R., & Low, W. C. (2007). Neurochemical  
954 changes in Huntington R6/2 mouse striatum detected by in vivo <sup>1</sup>H NMR spectroscopy. *Journal*  
955 *of Neurochemistry*, 100(5), 1397-1406.
- 956 Tong, J., Fitzmaurice, P. S., Moszczynska, A., Mattina, K., Ang, L.-C., Boileau, I., . . . Kish, S. J.  
957 (2016). Do glutathione levels decline in aging human brain? *Free Radical Biology and Medicine*,  
958 93, 110-117.
- 959 Tong, J., Furukawa, Y., Sherwin, A., Hornykiewicz, O., & Kish, S. J. (2011). Heterogeneous  
960 intrastriatal pattern of proteins regulating axon growth in normal adult human brain.  
961 *Neurobiology of Disease*, 41(2), 458-468.
- 962 Vasylenko, O., Gorecka, M. M., & Rodríguez Aranda, C. (2018). Manual dexterity in young and  
963 healthy older adults. 1. Age and gender related differences in unimanual and bimanual  
964 performance. *Developmental Psychobiology*, 60(4), 407-427.
- 965 Venkateshappa, C., Harish, G., Mahadevan, A., Bharath, M. S., & Shankar, S. (2012). Elevated  
966 oxidative stress and decreased antioxidant function in the human hippocampus and frontal  
967 cortex with increasing age: Implications for neurodegeneration in Alzheimer's disease.  
968 *Neurochemical Research*, 37(8), 1601-1614.
- 969 Washabaugh, E. P., Kalyanaraman, T., Adamczyk, P. G., Claffin, E. S., & Krishnan, C. (2017).  
970 Validity and repeatability of inertial measurement units for measuring gait parameters. *Gait &*  
971 *Posture*, 55, 87-93.
- 972 Weerasekera, A., Peeters, R., Sima, D., Dresselaers, T., Sunaert, S., De Vocht, J., . . .  
973 Himmelreich, U. (2019). Motor cortex metabolite alterations in amyotrophic lateral sclerosis  
974 assessed in vivo using edited and non-edited magnetic resonance spectroscopy. *Brain*  
975 *Research*, 1718, 22-31.
- 976 Wei, T., Simko, V., Levy, M., Xie, Y., Jin, Y., & Zemla, J. (2017). Package 'corrplot'. *Statistician*,  
977 56(316), e24.
- 978 Weiduschat, N., Mao, X., Hupf, J., Armstrong, N., Kang, G., Lange, D., . . . Shungu, D. (2014).  
979 Motor cortex glutathione deficit in ALS measured in vivo with the J-editing technique.  
980 *Neuroscience Letters*, 570, 102-107.
- 981 Williams, M. E., Hadler, N. M., & Earp, J. A. L. (1982). Manual ability as a marker of  
982 dependency in geriatric women. *Journal of Chronic Diseases*, 35(2), 115-122.

- 983 Wood, S. J., Berger, G. E., Wellard, R. M., Proffitt, T.-M., McConchie, M., Berk, M., . . . Pantelis,  
984 C. (2009). Medial temporal lobe glutathione concentration in first episode psychosis: a 1H-MRS  
985 investigation. *Neurobiology of Disease*, 33(3), 354-357.
- 986 Yang, H., Magilnick, N., Lee, C., Kalmaz, D., Ou, X., Chan, J. Y., & Lu, S. C. (2005). Nrf1 and  
987 Nrf2 regulate rat glutamate-cysteine ligase catalytic subunit transcription indirectly via NF- $\kappa$ B  
988 and AP-1. *Molecular and Cellular Biology*, 25(14), 5933-5946.  
989
